# Supplementary material for: Modeling and Preliminary Analysis of the Impact of Meteorological Conditions on the COVID-19 Epidemic
Source: MDPI journal article supplement (doi:10.3390/ijerph19106125), 2022-05-18
Supplement: s1 [file s1]

Table S1. Results At Different Lag Days.

| Regions    | Lag Days | R2(PLSR) | Significant factors and correlations |
|------------|----------|----------|--------------------------------------|
| UK         | 0        | 0.423    | T (+)                                |
|            | 5        | 0.437    | T (+)                                |
|            | 7        | 0.440    | T (+)                                |
|            | 14       | 0.457    | T (+), RH (-)                        |
| Morocco    | 0        | 0.577    | T (+), RH (+)                        |
|            | 5        | 0.620    | T (+), RH (+), P (-)                 |
|            | 7        | 0.636    | T (+), P (-)                         |
|            | 14       | 0.678    | T (+), P (-)                         |
| Nepal      | 0        | 0.716    | T (+), RH (+), V (+), P (-)          |
|            | 5        | 0.718    | T (+), RH (+), V (+), P (-)          |
|            | 7        | 0.716    | T (+), RH (+), V (+), P (-)          |
|            | 14       | 0.689    | T (+), RH (+), V (+), P (-)          |
| Uzbekistan | 0        | 0.517    | T (+), RH (+), P (-)                 |
|            | 5        | 0.478    | T (+), RH (+), P (-)                 |
|            | 7        | 0.452    | T (+), RH (+), P (-)                 |
|            | 14       | 0.361    | T (+), RH (+), P (-)                 |
| Wuhan      | 0        | 0.542    | T (-), RH (-), P (-)                 |
|            | 5        | 0.369    | T (-), RH (+), P (-)                 |
|            | 7        | 0.450    | RH (+), V (-), P (+)                 |
|            | 14       | 0.264    | T (-), RH (-), V (-), P (-)          |
| Alabama    | 0        | 0.466    | T (+), P (+)                         |
|            | 5        | 0.515    | T (+), RH (-)                        |
|            | 7        | 0.532    | T (+), RH (-)                        |
|            | 14       | 0.586    | T (+), RH (-)                        |
| Arizona    | 0        | 0.254    | T (-), RH (-), V (+)                 |
|            | 5        | 0.278    | T (-), RH (-), V (+)                 |
|            | 7        | 0.282    | T (-), RH (-), V (+)                 |
|            | 14       | 0.314    | T (-), RH (-)                        |
| California | 0        | 0.561    | T (+), RH (-), V (-), P (-)          |
|            | 5        | 0.642    | T (+), RH (-), V (-)                 |
|            | 7        | 0.668    | T (+), RH (-), V (-)                 |
|            | 14       | 0.735    | T (+), P (-)                         |
| Idaho      | 0        | 0.481    | T (+), RH (-), P (+)                 |
|            | 5        | 0.573    | T (+), RH (-), V (+), P (+)          |
|            | 7        | 0.603    | T (+), RH (-), P (+)                 |
|            | 14       | 0.685    | T (+), RH (-), P (+)                 |
| Kentucky   | 0        | 0.363    | T (+), V (-), P (+)                  |
|            | 5        | 0.430    | T (+), RH (+), P (+)                 |
|            | 7        | 0.451    | T (+), RH (+), P (+)                 |
|            | 14       | 0.517    | T (+), P (+)                         |

|               |    |       |                             |
|---------------|----|-------|-----------------------------|
| Massachusetts | 0  | 0.286 | T (-), P (-)                |
|               | 5  | 0.232 | T (-), P (-)                |
|               | 7  | 0.210 | T (-), P (-)                |
|               | 14 | 0.138 | T (-), RH (+)               |
| Montana       | 0  | 0.338 | T (+), RH (+), P (+)        |
|               | 5  | 0.361 | T (+), P (+)                |
|               | 7  | 0.366 | T (+), P (+)                |
|               | 14 | 0.395 | T (+), P (+)                |
| New Hampshire | 0  | 0.173 | T (+), RH (+)               |
|               | 5  | 0.210 | T (+), RH (+)               |
|               | 7  | 0.227 | T (+), RH (+)               |
|               | 14 | 0.280 | T (+), RH (+)               |
| North Dakota  | 0  | 0.679 | T (+), RH (-), V (-), P (+) |
|               | 5  | 0.723 | T (+), RH (-), P (+)        |
|               | 7  | 0.726 | T (+), RH (-), P (+)        |
|               | 14 | 0.718 | T (+), RH (-), V (-), P (+) |
| Oklahoma      | 0  | 0.300 | T (+), V (-), P (+)         |
|               | 5  | 0.366 | T (+), RH (+), V (-), P (+) |
|               | 7  | 0.391 | T (+), RH (+), V (-), P (+) |
|               | 14 | 0.467 | T (+), RH (+), V (-), P (+) |
| South Dakota  | 0  | 0.716 | T (+), V (-), P (+)         |
|               | 5  | 0.751 | T (+), P (+)                |
|               | 7  | 0.758 | T (+), P (+)                |
|               | 14 | 0.757 | T (+), P (+)                |
| Wisconsin     | 0  | 0.570 | T (+), RH (-), P (+)        |
|               | 5  | 0.614 | T (+), V (+), P (+)         |
|               | 7  | 0.625 | T (+), RH (-), V (+), P (+) |
|               | 14 | 0.652 | T (+), RH (-), P (+)        |
| Wyoming       | 0  | 0.487 | T (+), RH (-), V (-), P (+) |
|               | 5  | 0.505 | T (+), RH (-), V (-), P (+) |
|               | 7  | 0.505 | T (+), RH (-), V (-), P (+) |
|               | 14 | 0.497 | T (+), RH (-), V (-), P (+) |

Table S2. Results For Different Time Durations

| Regions | Time duration       | R2(PLSR) | Significant factors and correlations |
|---------|---------------------|----------|--------------------------------------|
| UK      | 2020.1.31-2021.5.2  | 0.423    | T (+)                                |
|         | 2020.1.31-2021.3.31 | 0.473    | T (+), RH (-)                        |
|         | 2020.1.31-2021.5.31 | 0.466    | T (+)                                |
| Morocco | 2020.3.2-2021.5.14  | 0.577    | T (+), RH (+)                        |
|         | 2020.3.2-2021.3.31  | 0.554    | T (+), P (-)                         |

|               |                     |       |                          |
|---------------|---------------------|-------|--------------------------|
|               | 2020.3.2-2021.5.31  | 0.558 | T (+)、RH (+)             |
| Nepal         | 2020.1.25-2021.2.28 | 0.716 | T (+)、RH (+)、V (+)、P (-) |
|               | 2020.1.25-2021.1.31 | 0.683 | T (+)、RH (+)、V (+)、P (-) |
|               | 2020.1.25-2021.3.31 | 0.743 | T (+)、RH (+)、V (+)、P (-) |
| Uzbekistan    | 2020.3.15-2021.2.24 | 0.517 | T (+)、RH (+)、P (-)       |
|               | 2020.3.15-2021.1.31 | 0.492 | T (+)、RH (+)、P (-)       |
|               | 2020.3.15-2021.2.28 | 0.507 | T (+)、RH (+)、P (-)       |
| Wuhan         | 2020.1.14-2020.3.13 | 0.542 | T (-)、RH (-)、P (-)       |
|               | 2020.1.14-2020.3.31 | 0.425 | T (-)、RH (-)、V (+)、P (-) |
|               | 2020.1.14-2020.4.30 | 0.150 | T (-)、RH (-)、P (-)       |
| Alabama       | 2020.3.13-2021.5.11 | 0.466 | T (+)、P (+)              |
|               | 2020.3.13-2021.3.31 | 0.491 | T (+)、RH (-)             |
|               | 2020.3.13-2021.5.31 | 0.417 | T (+)                    |
| Arizona       | 2020.1.26-2020.10.1 | 0.254 | T (-)、RH (-)、V (+)       |
|               | 2020.1.26-2020.8.31 | 0.182 | T (-)、RH (-)、P (-)       |
| California    | 2020.1.25-2021.4.18 | 0.561 | T (+)、RH (-)、V (-)、P (-) |
|               | 2020.1.25-2021.3.31 | 0.580 | T (+)、RH (-)、V (-)、P (-) |
|               | 2020.1.25-2021.4.30 | 0.570 | T (+)、RH (-)、V (-)、P (-) |
| Idaho         | 2020.3.13-2021.6.4  | 0.481 | T (+)、RH (-)、P (+)       |
|               | 2020.3.13-2021.4.30 | 0.586 | T (+)、RH (-)、V (+)、P (+) |
|               | 2020.3.13-2021.5.31 | 0.514 | T (+)、RH (-)、P (+)       |
| Kentucky      | 2020.3.6-2021.4.29  | 0.363 | T (+)、V (-)、P (+)        |
|               | 2020.3.6-2021.3.31  | 0.404 | T (+)、P (+)              |
|               | 2020.3.6-2021.5.31  | 0.308 | T (+)、RH (+)、P (+)       |
| Massachusetts | 2020.2.1-2021.7.29  | 0.286 | T (-)、P (-)              |
|               | 2020.2.1-2021.6.30  | 0.185 | T (-)、P (-)              |
|               | 2020.2.1-2021.8.31  | 0.430 | T (-)、P (-)              |
| Montana       | 2020.3.13-2021.4.26 | 0.338 | T (+)、RH (+)、P (+)       |
|               | 2020.3.13-2021.3.31 | 0.398 | T (+)、P (+)              |
|               | 2020.3.13-2021.5.31 | 0.282 | T (+)、RH (+)、V (+)、P (+) |
| New Hampshire | 2020.3.2-2021.7.14  | 0.173 | T (+)、RH (+)             |
|               | 2020.3.2-2021.5.31  | 0.264 | T (+)、RH (+)             |
|               | 2020.3.2-2021.6.30  | 0.208 | T (+)、RH (+)             |
| North Dakota  | 2020.3.11-2021.3.25 | 0.679 | T (+)、RH (-)、V (-)、P (+) |
|               | 2020.3.11-2021.2.28 | 0.613 | T (+)、RH (-)、P (+)       |
|               | 2020.3.11-2021.4.30 | 0.614 | T (+)、V (+)、P (+)        |
| Oklahoma      | 2020.3.6-2021.5.29  | 0.300 | T (+)、V (-)、P (+)        |
|               | 2020.3.6-2021.3.31  | 0.322 | T (+)、RH (+)、P (+)       |
|               | 2020.3.6-2021.4.30  | 0.332 | T (+)、RH (+)、P (+)       |
| South Dakota  | 2020.3.10-2021.4.13 | 0.716 | T (+)、V (-)、P (+)        |
|               | 2020.3.10-2021.3.31 | 0.800 | T (+)、P (+)              |
|               | 2020.3.10-2021.4.30 | 0.660 | T (+)、P (+)              |
| Wisconsin     | 2020.2.5-2021.4.29  | 0.570 | T (+)、RH (-)、P (+)       |

|         |                     |       |                          |
|---------|---------------------|-------|--------------------------|
| Wyoming | 2020.2.5-2021.3.31  | 0.625 | T (+)、RH (-)、V (+)、P (+) |
|         | 2020.2.5-2021.5.31  | 0.501 | T (+)、V (+)、P (+)        |
|         | 2020.3.11-2021.5.4  | 0.487 | T (+)、RH (-)、V (-)、P (+) |
|         | 2020.3.11-2021.3.31 | 0.554 | T (+)、RH (-)、V (-)、P (+) |
|         | 2020.3.11-2021.4.30 | 0.500 | T (+)、RH (-)、V (-)、P (+) |
